# Supplementary material for: Exact Calculation of the Joint Allele Frequency Spectrum for Isolation with Migration Models
Source: PubMed Central journal article supplement (PMC5586375; doi:10.1534/genetics.116.194019), 2017-07-10
Supplement: 241FileS1.pdf [file 241FileS1.pdf]

Supplement to “Exact calculation of the joint  
allele frequency spectrum for isolation with  
migration models”

Andrew D. Kern<sup>1</sup> and Jody Hey<sup>2</sup>

June 30, 2017

<sup>1</sup>Department of Genetics, Rutgers University, Piscataway, NJ 08554, USA

<sup>2</sup>Department of Biology, Temple University, Philadelphia, PA 19122 USA

| pop1 | pop2 | lik          | $N_1$     | $N_2$     | $N_A$     | $4Nm_{12}$ | $4Nm_{21}$ | $t_{div}$ | 95% CI $N_2$ | 95% CI $N_A$ | 95% CI $4Nm_{12}$ | 95% CI $4Nm_{21}$ | 95% CI $t_{div}$ |
|------|------|--------------|-----------|-----------|-----------|------------|------------|-----------|--------------|--------------|-------------------|-------------------|------------------|
| ED   | GU   | -104955.7618 | 63834.11  | 222269.94 | 80613.58  | 4.98       | 0.16       | 3939.55   | 13663.32     | 3703.80      | 0.14              | 0.13              | 255.89           |
| ED   | NG   | -133735.8783 | 67163.37  | 207423.81 | 118095.48 | 4.33       | 0.79       | 4332.84   | 14956.00     | 5267.41      | 0.16              | 0.22              | 239.69           |
| ED   | SP   | -116974.0971 | 56695.62  | 214161.24 | 88823.47  | 2.56       | 1.56       | 5577.46   | 15014.74     | 3896.12      | 0.10              | 0.17              | 254.84           |
| ED   | UG   | -92419.45582 | 63696.49  | 162379.37 | 76674.47  | 4.91       | 0.73       | 3628.34   | 12351.57     | 3885.39      | 0.23              | 0.24              | 253.81           |
| GU   | NG   | -186862.1182 | 312427.87 | 395230.05 | 150614.71 | 17.20      | 14.87      | 8496.82   | 94002.97     | 20344.21     | 2.14              | 6.87              | 1122.92          |
| GU   | SP   | -178614.0678 | 334285.47 | 429910.17 | 120165.22 | 0.37       | 7.91       | 9985.27   | 21183.04     | 3644.12      | 0.39              | 0.58              | 358.13           |
| GU   | UG   | -140765.3032 | 419695.00 | 348198.95 | 108844.22 | 12.17      | 9.93       | 7203.86   | 27632.06     | 5092.39      | 0.98              | 1.90              | 424.92           |
| NG   | SP   | -215684.7144 | 295844.35 | 432935.59 | 166976.94 | 1.97       | 6.87       | 10582.02  | 20473.44     | 4889.41      | 0.25              | 0.43              | 430.50           |
| NG   | UG   | -164929.6795 | 285763.09 | 339789.04 | 138162.32 | 12.92      | 2.60       | 8325.86   | 24895.30     | 6175.22      | 0.47              | 0.65              | 525.89           |
| SP   | UG   | -151679.0982 | 396609.71 | 231793.18 | 111410.91 | 12.61      | 1.97       | 9257.11   | 11359.69     | 3173.21      | 0.33              | 0.49              | 375.11           |

Table S1: Parameter estimates from IM-CLAM for pairwise combinations of populations. Estimates of  $4Nm$  are scaled in  $N_1$  for each population comparison respectively.  $t_{div}$  is given in years, assuming 15 generations per year and  $u = 5.49 \times 10^{-9}$ .

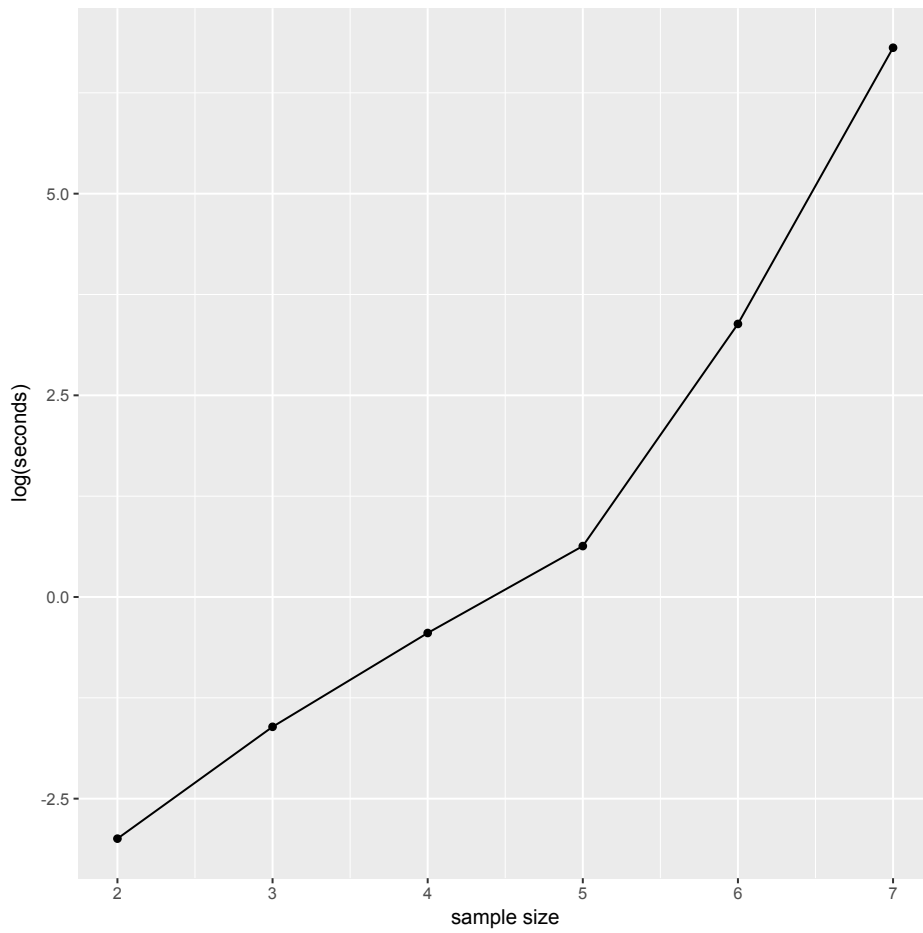

Figure S1: **Calculation time of the AFS as a function of sample size.** Here we show the time it takes to calculate the AFS as sample size for both populations increases equivalently. All jobs were run on 12 cores. The y-axis is shown on a log scale.

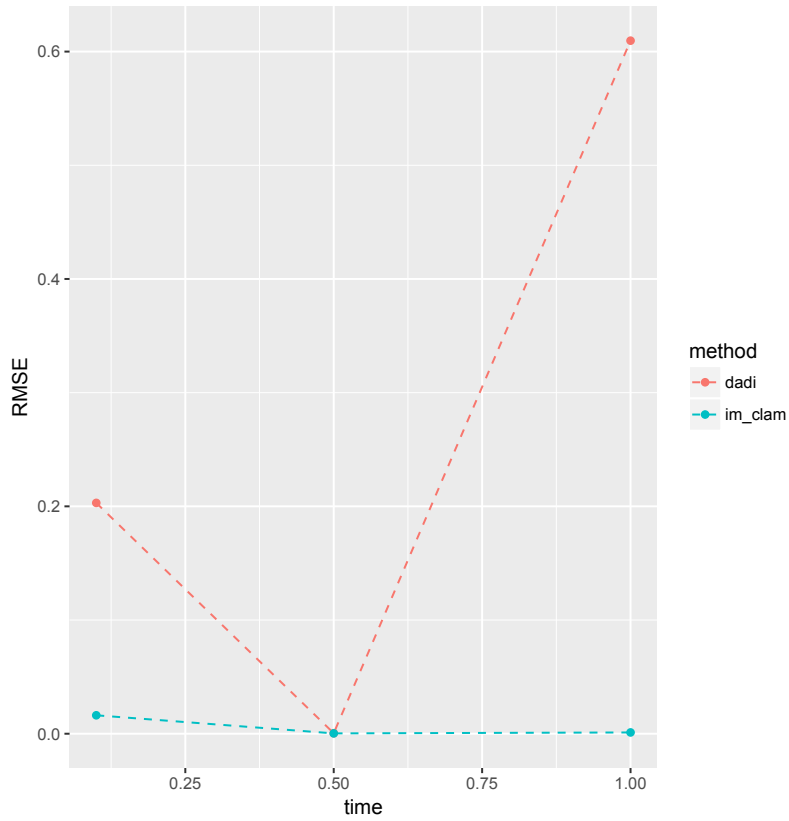

Figure S2: **Accuracy of parameter estimates across divergence time.** Here we show the root mean square error (RMSE) across all parameter estimates as a function of the three parameter sets used in Figure 6. Migration rates,  $m_{12} = 1.0$ ;  $m_{21} = 1.0$ , and divergence time varies from left to right  $t_{div} = 0.1, 0.5, 1.0$ .

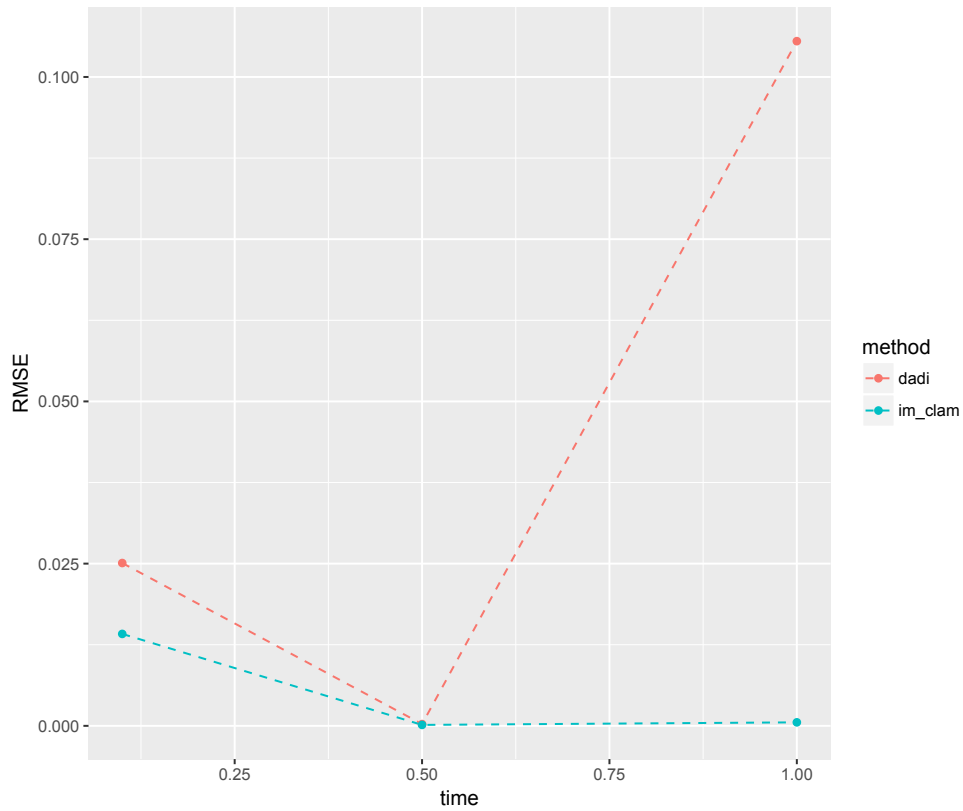

Figure S3: **Accuracy of parameter estimates across divergence time.** Here we show the root mean square error (RMSE) across all parameter estimates as a function of the three parameter sets used in Figure 7. Migration rates,  $m_{12} = 1.0; m_{21} = 0.1$ , and divergence time varies from left to right  $t_{div} = 0.1, 0.5, 1.0$ .

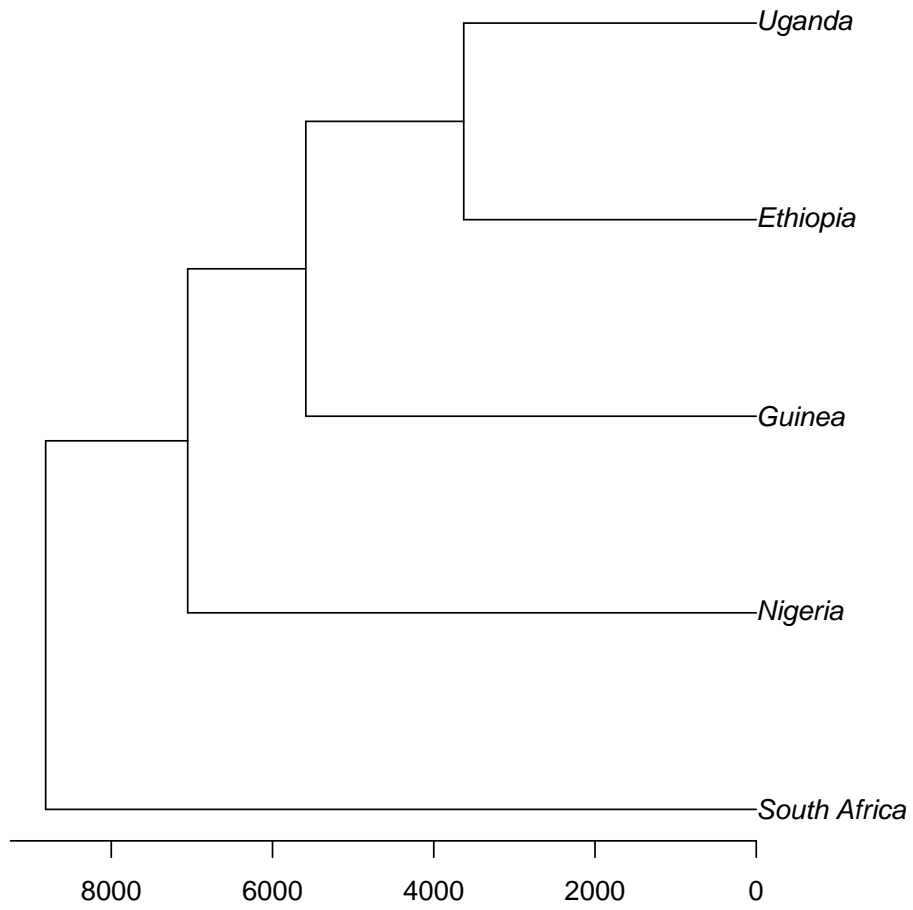

Figure S4: **Distance tree of population divergence times.** Using estimated divergence time in pairwise comparisons as a distance metric, we constructed a tree using UPGMA clustering. Times are in years, as depicted on the x-axis, assuming 15 generations per year, and  $u = 5.49 \times 10^{-9}$ .
